# Supplementary material for: Identification of established arrhythmogenic right ventricular cardiomyopathy mutation in a patient with the contrasting phenotype of hypertrophic cardiomyopathy
Source: Springer Nature journal article supplement (doi:10.1186/s12881-017-0385-8), 2017-03-03
Supplement: MOESM1 [file 12110974]

Table S1

| Gene           | Chrom | Position<br>(hg19) | Reference<br>Variant       | Variant | Variant Type        | Variant effect                                   | EXAC<br>Allele<br>Frequency |
|----------------|-------|--------------------|----------------------------|---------|---------------------|--------------------------------------------------|-----------------------------|
| <i>AGAP6</i>   | 10    | 51768674           | CAA                        | C       | frameshift deletion | NM_001077665:exon8:c.790_791del;p.264_264del     | 0                           |
| <i>CELA1</i>   | 12    | 51740414           | GAC                        | G       | frameshift deletion | NM_001971:exon1:c.7_8del;p.3_3del                | 0                           |
| <i>CLDN16</i>  | 3     | 190106071          | AG                         | A       | frameshift deletion | NM_006580:exon1:c.164delG;p.R55fs                | 0                           |
| <i>CLSTN2</i>  | 3     | 140251317          | CT                         | C       | frameshift deletion | NM_022131:exon9:c.1497delT;p.A499fs              | 0                           |
| <i>CTU2</i>    | 16    | 88780634           | AGGTGTG                    | A       | frameshift deletion | NM_001012759:exon10:c.1097_1097del;p.366_366del  | 0                           |
| <i>DCHS2</i>   | 4     | 155244401          | TTTTG                      | T       | frameshift deletion | NM_001142552:exon8:c.4095_4098del;p.1365_1366del | 0                           |
| <i>FANCD2</i>  | 3     | 10088406           | TAGTA                      | T       | frameshift deletion | NM_001018115:exon15:c.1278_1278del;p.426_426del  | 0                           |
| <i>GPRC5D</i>  | 12    | 13102481           | AGGCATT<br>GCCTTGTA<br>AAG | A       | frameshift deletion | NM_018654:exon1:c.821_837del;p.274_279del        | 3.45E-03                    |
| <i>HDGFRP2</i> | 19    | 4499632            | AAGCTGG<br>CCGGGGA<br>GG   | A       | frameshift deletion | NM_001001520:exon14:c.1721_1722del;p.574_574del  | 0                           |
| <i>LFNG</i>    | 7     | 2552881            | AGATG                      | A       | frameshift deletion | NM_001166355:exon2:c.139_142del;p.47_48del       | 0                           |
| <i>NOC3L</i>   | 10    | 96110026           | CA                         | C       | frameshift deletion | NM_022451:exon9:c.971delT;p.L324fs               | 8.24E-04                    |
| <i>OR10Q1</i>  | 11    | 57995644           | GA                         | G       | frameshift deletion | NM_001004471:exon1:c.703delT;p.S235fs            | 4.37E-04                    |
| <i>OR13C2</i>  | 9     | 107367391          | ATGTT                      | A       | frameshift deletion | NM_001004481:exon1:c.514_517del;p.172_173del     | 0                           |
| <i>OR5H6</i>   | 3     | 97983437           | TA                         | T       | frameshift deletion | NM_001005479:exon1:c.310delA;p.K104fs            | 0                           |
| <i>POLR3C</i>  | 1     | 145592761          | TG                         | T       | frameshift deletion | NM_006468:exon15:c.1533delC;p.A511fs             | 8.65E-04                    |
| <i>PRSS3</i>   | 9     | 33797930           | GAC                        | G       | frameshift deletion | NM_007343:exon3:c.476_477del;p.159_159del        | 0                           |
| <i>TGIF1</i>   | 18    | 3452222            | CT                         | C       | frameshift deletion | NM_170695:exon1:c.246delT;p.P82fs                | 0                           |
| <i>TSSC1</i>   | 2     | 3358354            | CA                         | C       | frameshift deletion | NM_003310:exon2:c.92delT;p.L31fs                 | 0                           |
| <i>ZC3H8</i>   | 2     | 112988507          | CTTCTT                     | C       | frameshift deletion | NM_032494:exon8:c.859_863del;p.287_288del        | 1.98E-03                    |
| <i>ZFPM1</i>   | 16    | 88599700           | CTCTG                      | C       | frameshift deletion | NM_153813:exon10:c.1335_1338del;p.445_446del     | 0                           |
| <i>ZNF142</i>  | 2     | 219507409          | TTGACA                     | T       | frameshift deletion | NM_001105537:exon8:c.3825_3829del;p.1275_1277del | 0                           |

Table S1

|                  |    |           |    |                  |                      |                                                               |          |
|------------------|----|-----------|----|------------------|----------------------|---------------------------------------------------------------|----------|
| <i>C20orf197</i> | 20 | 58645791  | A  | AG               | frameshift insertion | NM_173644:exon4:c.210dupG<br>:p.K70fs                         | 2.97E-04 |
| <i>CDCP2</i>     | 1  | 54605318  | T  | TG               | frameshift insertion | NM_201546:exon4:c.1224dup<br>C:p.M409fs                       | 0        |
| <i>HRNR</i>      | 1  | 152185812 | C  | CAG              | frameshift insertion | NM_001009931:exon3:c.8292<br>_8293insCT:p.G2765fs             | 0        |
| <i>KRTAP9-1</i>  | 17 | 39346626  | G  | GTGGGT           | frameshift insertion | NM_001190460:exon1:c.488_<br>489insTGGGT:p.C163fs             | 0        |
| <i>PRUNE2</i>    | 9  | 79324134  | GA | GGTGAC<br>TGTTGC | frameshift insertion | NM_015225:exon8:c.3055_30<br>56insCTGCAACAGTCAC:p.S101<br>9fs | 0        |
| <i>PRUNE2</i>    | 9  | 79324153  | G  | GTTGC            | frameshift insertion | NM_015225:exon8:c.3036_30<br>37insGCAA:p.Q1013fs              | 1.66E-05 |
| <i>PTCHD2</i>    | 1  | 11579472  | T  | TC               | frameshift insertion | NM_020780:exon8:c.1951dup<br>C:p.A650fs                       | 8.27E-06 |
| <i>PTCHD3</i>    | 10 | 27702256  | G  | GC               | frameshift insertion | NM_001034842:exon1:c.923d<br>upG:p.G308fs                     | 0        |
| <i>ADAMTSL5</i>  | 19 | 1506031   | G  | A                | nonsynonymous        | NM_213604:exon12:c.C1399T:<br>p.R467W                         | 4.67E-03 |
| <i>APC2</i>      | 19 | 1457002   | G  | C                | nonsynonymous        | NM_005883:exon9:c.G967C:p.<br>G323R                           | 0        |
| <i>ATP8B4</i>    | 15 | 50223353  | C  | A                | nonsynonymous        | NM_024837:exon16:c.G1605T<br>:p.L535F                         | 1.72E-03 |
| <i>AUTS2</i>     | 7  | 69064650  | C  | T                | nonsynonymous        | NM_001127232:exon1:c.C11T:<br>p.P4L                           | 7.22E-04 |
| <i>BHLHB9</i>    | X  | 102004875 | T  | C                | nonsynonymous        | NM_001142524:exon4:c.T952<br>C:p.C318R                        | 4.78E-03 |
| <i>BMP8B</i>     | 1  | 40254155  | C  | A                | nonsynonymous        | NM_001720:exon1:c.G3T:p.M<br>1I                               | 0        |
| <i>BTNL3</i>     | 5  | 180416029 | A  | G                | nonsynonymous        | NM_197975:exon1:c.A1G:p.M<br>1V                               | 0        |
| <i>C7orf72</i>   | 7  | 50175760  | T  | G                | nonsynonymous        | NM_001161834:exon5:c.T934<br>G:p.F312V                        | 2.15E-03 |
| <i>CALHM1</i>    | 10 | 105218160 | C  | T                | nonsynonymous        | NM_001001412:exon1:c.G349<br>A:p.V117I                        | 1.11E-03 |
| <i>CMYA5</i>     | 5  | 79024833  | G  | A                | nonsynonymous        | NM_153610:exon2:c.G245A:p.<br>G82E                            | 3.06E-04 |
| <i>COL6A2</i>    | 21 | 47542052  | C  | T                | nonsynonymous        | NM_058174:exon19:c.C1552T:<br>p.P518S                         | 8.79E-03 |
| <i>COL6A3</i>    | 2  | 238277379 | C  | T                | nonsynonymous        | NM_057166:exon7:c.G2906A:<br>p.R969Q                          | 0.01     |
| <i>DNAJC5G</i>   | 2  | 27499675  | G  | A                | nonsynonymous        | NM_173650:exon3:c.G79A:p.<br>G27S                             | 0        |
| <i>DOK3</i>      | 5  | 176931030 | A  | T                | nonsynonymous        | NM_024872:exon6:c.T1445A:p<br>.L482Q                          | 0        |
| <i>GPR179</i>    | 17 | 36486848  | C  | G                | nonsynonymous        | NM_001004334:exon11:c.G26<br>04C:p.E868D                      | 5.06E-03 |
| <i>HIPK1</i>     | 1  | 114514635 | G  | C                | nonsynonymous        | NM_152696:exon15:c.G3203C<br>:p.R1068T                        | 4.12E-05 |

Table S1

|                 |    |           |   |                 |               |                                                        |          |
|-----------------|----|-----------|---|-----------------|---------------|--------------------------------------------------------|----------|
| <i>KIR3DL2</i>  | 19 | 55378166  | G | A               | nonsynonymous | NM_006737:exon9:c.G1348A:p.G450S                       | 2.30E-03 |
| <i>MGA</i>      | 15 | 41989088  | G | A               | nonsynonymous | NM_001080541:exon3:c.G1880A:p.R627Q                    | 0        |
| <i>MYLK4</i>    | 6  | 2678541   | C | T               | nonsynonymous | NM_001012418:exon10:c.G953A:p.C318Y                    | 1.85E-03 |
| <i>NOTCH3</i>   | 19 | 15276238  | T | C               | nonsynonymous | NM_000435:exon31:c.A5756G:p.E1919G                     | 0        |
| <i>OSGIN1</i>   | 16 | 83992895  | A | G               | nonsynonymous | NM_182981:exon3:c.A98G:p.Y33C                          | 1.52E-03 |
| <i>PIGC</i>     | 1  | 172410967 | G | A               | nonsynonymous | NM_153747:exon2:c.C796T:p.P266S                        | 0        |
| <i>POF1B</i>    | X  | 84563220  | C | T               | nonsynonymous | NM_024921:exon10:c.G960A:p.M320I                       | 9.07E-05 |
| <i>RGS22</i>    | 8  | 100994172 | T | C               | nonsynonymous | NM_001286692:exon22:c.A3317G:p.E1106G                  | 3.72E-03 |
| <i>SLC3A2</i>   | 11 | 62649421  | G | T               | nonsynonymous | NM_001013251:exon2:c.G481T:p.G161C                     | 8.48E-04 |
| <i>SLCO5A1</i>  | 8  | 70667793  | C | T               | nonsynonymous | NM_030958:exon4:c.G1124A:p.R375Q                       | 4.17E-03 |
| <i>STXBP5L</i>  | 3  | 121126425 | G | T               | nonsynonymous | NM_014980:exon24:c.G2995T:p.A999S                      | 9.43E-04 |
| <i>TRAPPC10</i> | 21 | 45483598  | C | T               | nonsynonymous | NM_003274:exon7:c.C970T:p.P324S                        | 1.98E-04 |
| <i>UBASH3A</i>  | 21 | 43836715  | T | A               | nonsynonymous | NM_001001895:exon5:c.T718A:p.Y240N                     | 6.60E-05 |
| <i>ZC3H13</i>   | 13 | 46541962  | C | T               | nonsynonymous | NM_015070:exon15:c.G3998A:p.R1333H                     | 0        |
| <i>ZDHHC14</i>  | 6  | 158094126 | G | A               | nonsynonymous | NM_024630:exon9:c.G1439A:p.R480H                       | 2.51E-05 |
| <i>ZNF318</i>   | 6  | 43307399  | G | A               | nonsynonymous | NM_014345:exon10:c.C4337T:p.P1446L                     | 6.33E-03 |
| <i>PIWIL3</i>   | 22 | 25124143  | C | T               | splicing      | NM_001255975:exon16:c.1905+1G>A                        | 5.35E-03 |
| <i>PKP2</i>     | 12 | 32955491  | C | G               | splicing      | NM_004572:exon12:c.2146-1G>C                           | 4.94E-05 |
| <i>SLC24A2</i>  | 9  | 19550134  | C | G               | splicing      | NM_020344:exon8:c.1479+1G>C                            | 0        |
| <i>CABLES1</i>  | 18 | 20715874  | G | T               | stopgain      | NM_001100619:exon1:c.G148T:p.E50X                      | 0        |
| <i>CCDC66</i>   | 3  | 56591278  | T | TGGGGT<br>AAGCA | stopgain      | NM_001141947:exon1:c.8_9insGGGGTAAGCA:p.L3_G4delinsLGX | 0        |
| <i>CEP104</i>   | 1  | 3761541   | G | A               | stopgain      | NM_014704:exon6:c.C496T:p.R166X                        | 2.47E-05 |
| <i>FUT1</i>     | 19 | 49253809  | G | A               | stopgain      | NM_000148:exon4:c.C730T:p.Q244X                        | 0        |
| <i>GLP2R</i>    | 17 | 9745887   | G | A               | stopgain      | NM_004246:exon4:c.G458A:p.W153X                        | 0        |

Table S1

|                |    |           |    |                                            |          |                                                                               |          |
|----------------|----|-----------|----|--------------------------------------------|----------|-------------------------------------------------------------------------------|----------|
| <i>HS3ST6</i>  | 16 | 1962046   | CG | TA                                         | stopgain | NM_001009606:exon2:c.480delC:p.Y160X                                          | 0        |
| <i>LGALS8</i>  | 1  | 236702209 | CA | TG                                         | stopgain | NM_201543:exon5:c.166delA:p.M56X                                              | 0        |
| <i>OBSCN</i>   | 1  | 228550291 | C  | T                                          | stopgain | NM_001271223:exon91:c.C21547T:p.R7183X                                        | 0        |
| <i>OR2T35</i>  | 1  | 248801602 | T  | TCA                                        | stopgain | NM_001001827:exon1:c.957_958insTG:p.I320_R321delinsX                          | 0        |
| <i>PITRM1</i>  | 10 | 3208567   | T  | TGCACG<br>CTAGGG<br>AAGAGA<br>GAGGA<br>ATG | stopgain | NM_001242309:exon3:c.175_176insCATTCTCTCTCTCCCTAGCGTGC:p.Q59_F60delinsPFLSLPX | 0        |
| <i>PKHD1L1</i> | 8  | 110477066 | C  | T                                          | stopgain | NM_177531:exon49:c.C8005T:p.Q2669X                                            | 1.33E-03 |
| <i>PREX2</i>   | 8  | 68993013  | AT | GC                                         | stopgain | NM_025170:exon17:c.1819delT:p.L607X                                           | 0        |
| <i>PSG11</i>   | 19 | 43529026  | CA | TG                                         | stopgain | NM_002785:exon2:c.246delT:p.Y82X                                              | 0        |
| <i>STAP2</i>   | 19 | 4328755   | G  | C                                          | stopgain | NM_017720:exon6:c.C507G:p.Y169X                                               | 0        |
| <i>TAS2R31</i> | 12 | 11183035  | C  | T                                          | stopgain | NM_176885:exon1:c.G900A:p.W300X                                               | 9.53E-03 |
| <i>ZNF729</i>  | 19 | 22498942  | GT | CC                                         | stopgain | NM_001242680:exon4:c.2724delT:p.C908X                                         | 0        |
